# Supplementary material for: A Novel Mitovirus PsMV2 Facilitates the Virulence of Wheat Stripe Rust Fungus
Source: MDPI journal article supplement (doi:10.3390/v15061265), 2023-05-28
Supplement: s1 [file s1]

**Supplementary Table S1.** Primers used in this study.

| Function                                | Primer Name        | Primer Sequence (5'-3')                           |
|-----------------------------------------|--------------------|---------------------------------------------------|
| RACE                                    | 5' RACE-GSP1       | CCGACAGAGCCCTTATCTTATT                            |
|                                         | 5' RACE-GSP2       | GAAAGGAGCAGTGGTGTCTTT                             |
|                                         | 5' RACE-nested GSP | GGATGTTATGATACGAGCCTTT                            |
|                                         | 3' RACE-GSP1       | GCCTATCATCAGTTGGTCTTACTTT                         |
|                                         | 3' RACE-nested GSP | GGACGTATCATATAGTTCTCGGTATT                        |
| Gene expression                         | PsMV2-T-F          | CCCCTGTCCACGTAATGTGGACAACTCCTA                    |
|                                         | PsMV2-T-R          | GCCCTTGTCCCCAGTAATGGGGACAACGCT                    |
|                                         | PsMV2-RdRp-F       | CACCTCTCCACTAAGGCG                                |
|                                         | PsMV2-RdRp-R       | GATTGGGAAAGGGCTATGCT                              |
| BSMV-HIGS                               | BSMV-PsMV2-1as-F   | TTTTTAGCTAGCTGATTAATTAAGGAC<br>CCGATTAAAGCACGA    |
|                                         | BSMV-PsMV2-1as-R   | TCCGTTGCTAGCTGAGCGGCCGCAGAAT<br>TCGGAGGGCATCACC   |
|                                         | BSMV-PsMV2-2as-F   | TTTTTAGCTAGCTGATTAATTAACCCGTT<br>ATGGGAAGATTCCGT  |
|                                         | BSMV-PsMV2-2as-R   | TCCGTTGCTAGCTGAGCGGCCGCATACT<br>CTCTCGCCAGGTCGT   |
| Overexpression in <i>N. benthamiana</i> | PsMV2-PVX-RdRp-F   | AGGTCAGCACCAGCTAGCATCGATCACCTCTCCACTAAG<br>GCGGG  |
|                                         | PsMV2-PVX-RdRp-R   | CTTAACCGTTCATCGGCGGTGACGATTGGGAAAGGGCT<br>ATGCTCC |
|                                         | PVX-F              | CAATCACAGTGTGGCTTGC                               |
|                                         | PVX-R              | GACCCTATGGGCTGTGTTG                               |
| qRT-PCR                                 | Q-PsMV2-F          | ATCTAACGGCTGCGACTGAC                              |
|                                         | Q-PsMV2-R          | GCCCTACGGCATAACCGAATC                             |
|                                         | TaEF1-F            | TGGTGTCAATCAAGCCTGGTATGGT                         |
|                                         | TaEF1-R            | ACTCATGGTGCATCTCAACGGACT                          |
|                                         | PstEF1-F           | TTCGCCGTCCGTGATATGAGACAA                          |
|                                         | PstEF1-R           | ATGCGTATCATGGTGGTGGAGTGA                          |

**Supplementary Table S2.** Virus names and viral protein accession numbers used for phylogenetic analysis.

| Family and Genus                           | Virus                                 | RdRp          |
|--------------------------------------------|---------------------------------------|---------------|
|                                            |                                       | Accession No. |
| <i>Mitoviridae</i><br><i>Unuamitovirus</i> | Puccinia striiformis mitovirus 2      | OQ263177.1    |
|                                            | Cronartium ribicola mitovirus 1       | AMQ67414.1    |
|                                            | Sclerotinia sclerotiorum mitovirus 9  | AHF48625.1    |
|                                            | Hymenoscyphus fraxineus mitovirus 1   | AZG04326.1    |
|                                            | Sclerotinia sclerotiorum mitovirus 15 | AHF48631.1    |
|                                            | Puccinia striiformis mitovirus 1      | AZY91986.1    |
|                                            | Fusarium circinatum mitovirus 1       | AKK23542.1    |
|                                            | Fusarium globosum mitovirus 1         | BAQ36629.1    |
|                                            | Fusarium coeruleum mitovirus 1        | BAQ36630.1    |
|                                            | Fusarium poae mitovirus 2             | UWK02074.1    |
|                                            | Thielaviopsis basicola mitovirus      | AAZ95420.1    |
|                                            | Sclerotinia sclerotiorum mitovirus 4  | AGC24233.1    |
|                                            | Leptosphaeria biglobosa mitovirus 1   | AVZ65960.1    |
|                                            | Ophiostoma mitovirus 4                | NP_660179.1   |

|                       |                                      |            |
|-----------------------|--------------------------------------|------------|
| <i>Duamitovirus</i>   | Helicobasidium mompa mitovirus 1-18  | BAD72871.1 |
|                       | Sclerotinia sclerotiorum mitovirus 3 | AGC24232.1 |
|                       | Ophiostoma mitovirus 3a              | CAA06228.1 |
|                       | Sclerotinia homoeocarpa mitovirus    | AAO21337.1 |
|                       | Botrytis cinerea mitovirus 1         | QLF49185.1 |
|                       | Ophiostoma mitovirus 3b              | CAJ32468.1 |
|                       | Ophiostoma mitovirus 1a              | CAJ32466.1 |
|                       | Tuber aestivum mitovirus             | AEG79311.1 |
|                       | Ophiostoma mitovirus 1b              | CAJ32467.1 |
|                       | Ophiostoma mitovirus 1c              | AGT55876.1 |
| <i>Kvaramitovirus</i> | Ophiostoma mitovirus 7               | AGT55877.1 |
| <i>Triamitovirus</i>  | Rhizoctonia solani mitovirus 39      | QIS79099.1 |
|                       | Rhizoctonia solani mitovirus 30      | QDW65420.1 |
|                       | Rhizoctonia solani mitovirus 23      | QDW65458.1 |
|                       | Rhizoctonia mitovirus 1 RS002        | AHL25281.1 |
|                       | Geopora sumneriana mitovirus 1       | QDM55307.1 |
| <i>Narnaviridae</i>   | Tuber excavatum mitovirus            | AEP83726.1 |
|                       | Rhizophagus sp. RF1 mitovirus        | BAJ23143.2 |
|                       | Saccharomyces 20S RNA narnavirus     | AAC98925.1 |
|                       | Saccharomyces 23S RNA narnavirus     | UQB84404.1 |

**Supplementary Table S3.** Information of BLASTp search results of the RNA-dependent RNA polymerase (RdRp) of *Puccinia striiformis* mitovirus 1.

| Taxon                 | Viruse Name                           | Accession  | Query Cover (%) | Identity (%)  | E-Value |
|-----------------------|---------------------------------------|------------|-----------------|---------------|---------|
| <i>Unuamitovirus</i>  | Cronartium ribicola mitovirus 1       | AMQ67414.1 | 99              | 391/807 (48%) | 0       |
|                       | Puccinia striiformis mitovirus 1      | AZY91986.1 | 81              | 192/670 (29%) | 2e-56   |
|                       | Helicobasidium mompa mitovirus 1-18   | BAD72871.1 | 79              | 202/644 (31%) | 1e-68   |
|                       | Sclerotinia sclerotiorum mitovirus 9  | AHF48625.1 | 54              | 146/442 (33%) | 2e-54   |
|                       | Sclerotinia sclerotiorum mitovirus 15 | AHF48631.1 | 54              | 157/444 (35%) | 1e-59   |
| <i>Duamitovirus</i>   | Botrytis cinerea mitovirus 1          | QLF49185.1 | 52              | 149/468 (32%) | 4e-48   |
|                       | Tuber aestivum mitovirus              | AEG79311.1 | 24              | 77/220 (35%)  | 4e-33   |
|                       | Sclerotinia sclerotiorum mitovirus 3  | AGC24232.1 | 52              | 138/434 (32%) | 1e-36   |
|                       | Ophiostoma mitovirus 3a               | CAA06228.1 | 51              | 129/445 (29%) | 6e-34   |
| <i>Kvaramitovirus</i> | Ophiostoma mitovirus 7                | AGT55877.1 | 43              | 87/371 (23%)  | 3e-23   |
| <i>Triamitovirus</i>  | Tuber excavatum mitovirus             | AEP83726.1 | 37              | 103/305 (34%) | 3e-40   |
|                       | Rhizoctonia mitovirus 1 RS002         | AHL25281.1 | 51              | 127/425 (30%) | 2e-45   |
|                       | Rhizoctonia solani mitovirus 39       | QIS79099.1 | 37              | 101/307 (33%) | 1e-35   |
|                       | Rhizoctonia solani mitovirus 23       | QDW65458.1 | 38              | 102/315 (32%) | 1e-38   |
|                       | Geopora sumneriana mitovirus 1        | QDM55307.1 | 46              | 116/383 (30%) | 1e-37   |

**Supplementary Table S4.** RT-PCR detection of PsMV2 in 20 *Pst* samples collected in different regions in China (11 different provinces) and in 10 *Pst* samples from 10 other countries.

| Source  | Sample Number (Strain) | Detection Rate (%) |
|---------|------------------------|--------------------|
| Hubei   | 48-16                  | 100%               |
|         | 47-17                  |                    |
| Guizhou | GZ-3-1                 |                    |
|         | GZ-43-1                |                    |

---

|               |          |
|---------------|----------|
| Sichuan       | MY-31    |
|               | MY-12-2  |
| Henan         | LSN-11-6 |
|               | LSN-6-10 |
| Yunnan        | 17-1     |
|               | 18-7     |
| Shandong      | 2-3-5    |
|               | 3-16     |
| Xinjiang      | XJ-1     |
| Gansu         | GS-1     |
|               | GS-2     |
| Qinghai       | QH-1     |
| Ningxia       | NX-1     |
|               | NX-2     |
| Shaanxi       | YL-1     |
|               | YL-2     |
| Egypt         | EGY11    |
| America       | US10     |
| Denmark       | DEN1     |
| Chile         | CHI5     |
| Liechtenstein | LIE13    |
| Australian    | AUS14    |
| Turkey        | TUR6     |
| Nepal         | NEP13    |
| Germany       | GER2     |
| Israel        | ISR11    |

---
